# Supplementary material for: Flexible, sandwich-like Ag-nanowire/PEDOT:PSS-nanopillar/MnO2high performance supercapacitors
Source: Royal Society of Chemistry journal article supplement (doi:10.1039/c4ta01245c), 2014-01-01
Supplement: c4ta01245c1.pdf [file c4ta01245c1.pdf]

## Electronic Supplementary Information

# Flexible, sandwich-like Ag-nanowire/PEDOT:PSS-nanopillar/MnO<sub>2</sub> high performance supercapacitors

*Zenan Yu, Chao Li, Danielle Abbitt, and Jayan Thomas\**

NanoScience Technology Center, Department of Material Science and Engineering, and CREOL,  
College of Optics and Photonics, University of Central Florida, Florida 32826, United States

### 1. Specific capacitance calculation.

#### a. Single electrode.

The specific capacitance ( $C_{sp}$ ) of one electrode is calculated as:

$$C_{sp} = \frac{C_{\text{electrode}}}{m}$$

where  $m$  is the mass of active material of one electrode.  $C_{\text{electrode}}$  is the capacitance measured by three-electrode system.<sup>1,2</sup>

In GCD measurements, capacitance can be computed as given below:<sup>3-6</sup>

$$C_{\text{electrode}} = \frac{I \times (\Delta t_{\text{Ag/PEDOT:PSS/MnO}_2} - \Delta t_{\text{Ag/PEDOT:PSS}})}{\Delta V}$$

where  $I$  is the discharge current,  $\Delta t$  is the discharge time, and  $\Delta V$  is the voltage window excluding the voltage drop.

#### b. Device.

Cell capacitance ( $C_{\text{cell}}$ ) is calculated from the discharge curve of GCD measurement using the following equation:

$$C_{\text{cell}} = \frac{I \times \Delta t}{\Delta V}$$

where  $I$  is the discharge current,  $\Delta t$  is the discharge time, and  $\Delta V$  is the voltage difference of discharge (obtained from the discharge curve excluding the voltage drop).

Volumetric specific capacitance ( $C_{vsp}$ ) of device can be calculated as:

$$C_{vsp} = \frac{C_{cell}}{v}$$

where  $v$  ( $\text{cm}^3$ ) is the total volume of device including active material, current collector, PAN substrate, electrolyte, and separator.

## 2. Energy and power densities calculation.

The energy density ( $E$ ) and power density ( $P$ ) can be calculated as follows:

$$E = \frac{1}{2} C_{vsp} \Delta V^2$$

$$P = \frac{E}{\Delta t}$$

where,  $\Delta V$  is the voltage difference of discharge and  $\Delta t$  is the discharge time.<sup>7,8</sup>

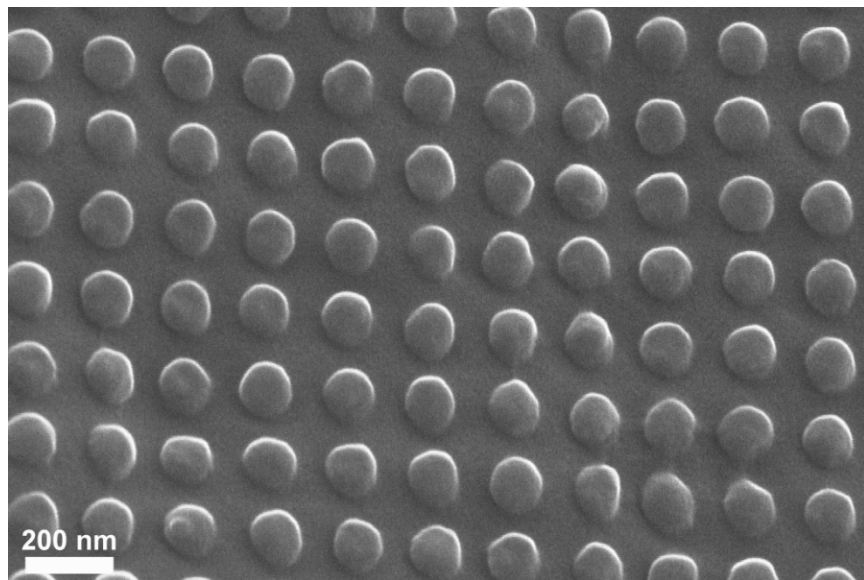

**Fig. S1** SEM image of PEDOT:PSS nanostructure.

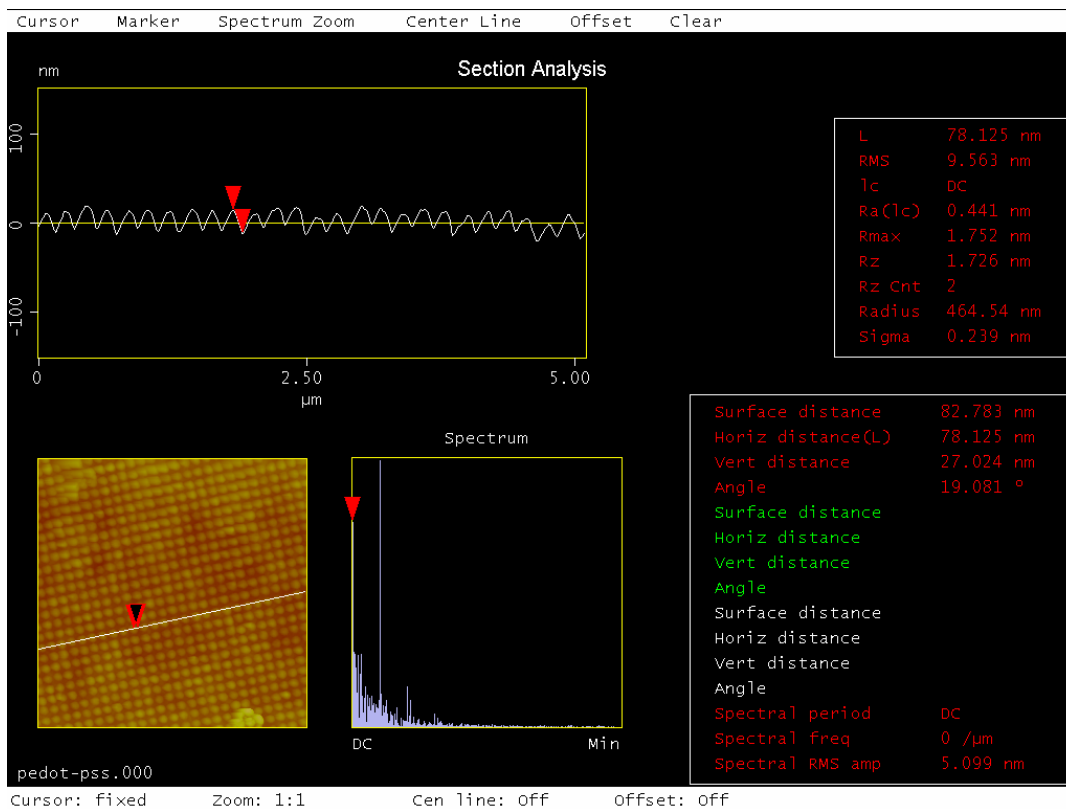

**Fig. S2** AFM image of Ag-NW/PEDOT:PSS nanostructure.

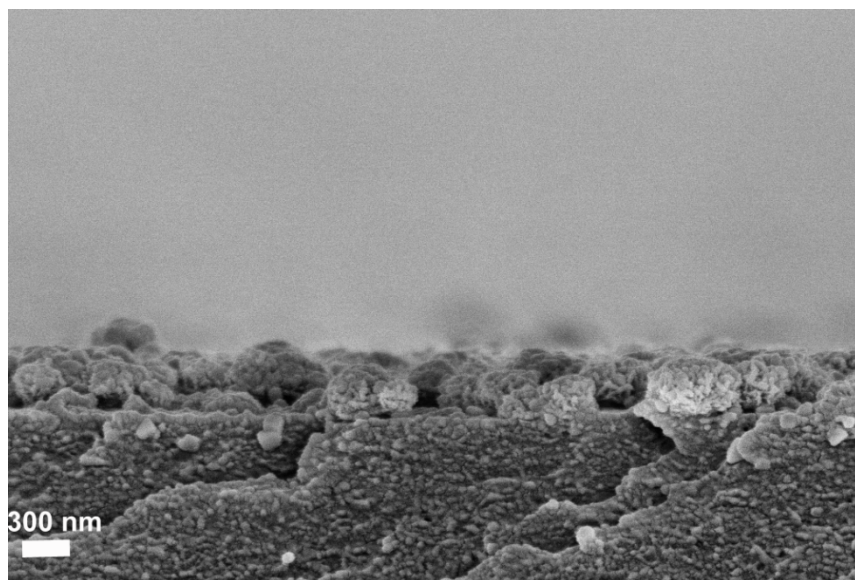

**Fig. S3** Cross-sectional SEM image of Ag-NW/PEDOT:PSS-NP/MnO<sub>2</sub> composites.

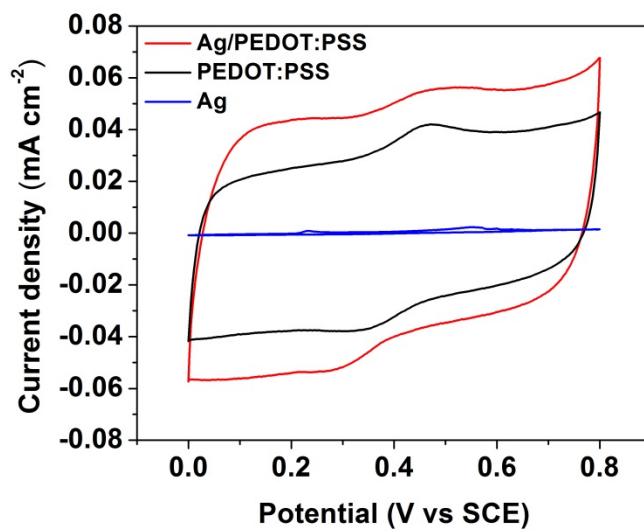

**Fig. S4** CV curves of Ag-NW, PEDOT:PSS-NP, and Ag-NW/PEDOT:PSS-NP at a scan rate of 100 mV s<sup>-1</sup>.

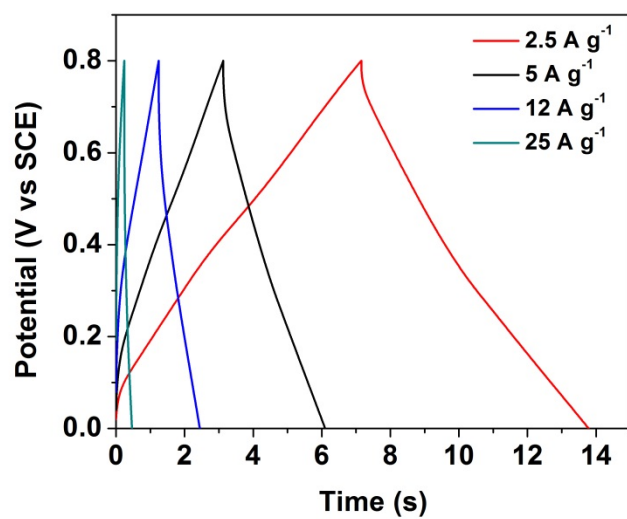

**Fig. S5** GCD curves of Ag-NW/PEDOT:PSS-NP at different current densities (2.5-25 A g<sup>-1</sup>).

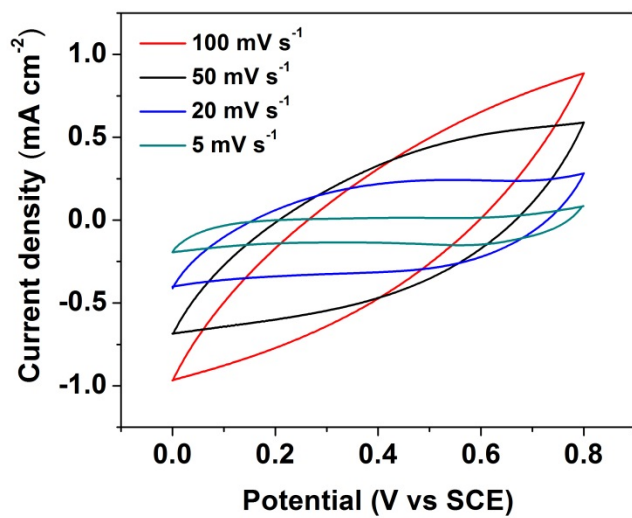

**Fig. S6** CV curves of Ag-NW/PEDOT:PSS-NP/MnO<sub>2</sub> at different scan rates (5-100 mV s<sup>-1</sup>).

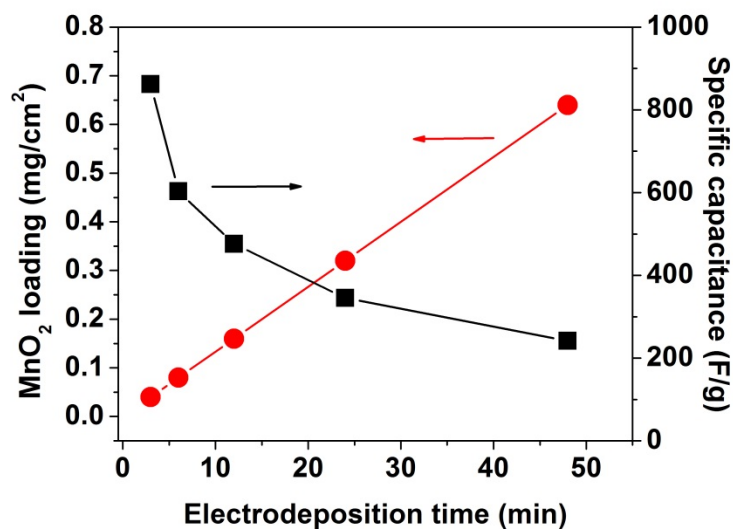

**Fig. S7** MnO<sub>2</sub> loading and specific capacitance at 2.5 A g<sup>-1</sup> as a function of electrodeposition time.

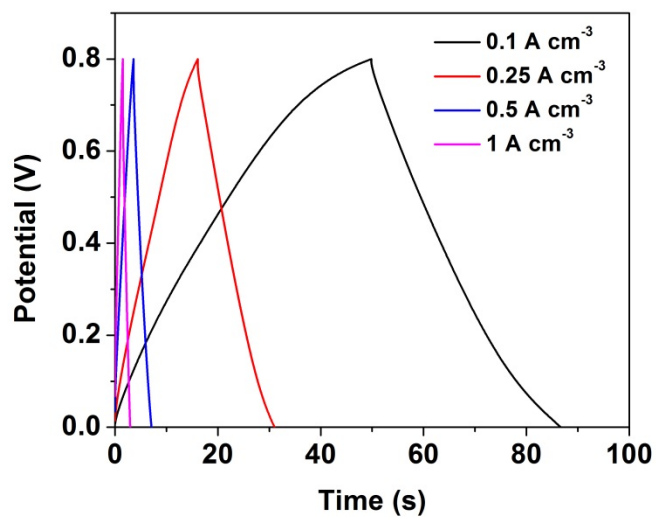

**Fig. S8** GCD curves of Ag-NW/PEDOT:PSS-NP/MnO<sub>2</sub> SC device at different current densities.

### References for supporting section

1. J. Chmiola, C. Largeot, P. L. Taberna, P. Simon and Y. Gogotsi, *Science*, 2010, **328**, 480-483.
2. M. D. Stoller and R. S. Ruoff, *Energy Environ. Sci.*, 2010, **3**, 1294-1301.

3. X. Lu, T. Zhai, X. Zhang, Y. Shen, L. Yuan, B. Hu, L. Gong, J. Chen, Y. Gao, J. Zhou, Y. Tong and Z. L. Wang, *Adv. Mater.*, 2012, **24**, 938-944.
4. L. Yuan, X. H. Lu, X. Xiao, T. Zhai, J. Dai, F. Zhang, B. Hu, X. Wang, L. Gong and J. Chen, *ACS Nano*, 2012, **6**, 656-661.
5. S. W. Lee, J. Kim, S. Chen, P. T. Hammond and Y. Shao-Horn, *ACS Nano*, 2010, **4**, 3889-3896.
6. S. Dong, X. Chen, L. Gu, X. Zhou, L. Li, Z. Liu, P. Han, H. Xu, J. Yao and H. Wang, *Energy Environ. Sci.*, 2011, **4**, 3502-3508.
7. J. Yan, E. Khoo, A. Sumboja and P. S. Lee, *ACS Nano*, 2010, **4**, 4247-4255.
8. Q. Li, Z. L. Wang, G. R. Li, R. Guo, L. X. Ding and Y. X. Tong, *Nano Lett.*, 2012, **12**, 3803-3807.
